# Supplementary material
Source: PubMed Central journal article supplement (PMC2664686)
Supplement: NIHMS92944-supplement-Table_1_and_Fi.pdf [file NIHMS92944-supplement-Table_1_and_Fi.pdf]

## **Supplement**

**Supplementary Table 1. EPA and DHA levels in human subjects.**

**Supplementary Figure 1. GC-MS spectrum of methyl-d<sub>5</sub>-EPA, methyl-d<sub>5</sub>-DHA and methyl parinarate.**

**Supplementary Figure 2. Peritoneal leukocyte composition: FACS analysis.** Lavage cells were stained with PE-conjugated anti-mouse Ly-6G and PerCP-Cy5.5-conjugated anti-mouse CD11b. Ly-6G is primarily expressed on PMN while CD11b is expressed on both PMN and monocytes.

A) zymosan A-induced acute inflammation; B) acute inflammation + d<sub>5</sub>-EPA and d<sub>5</sub>-DHA.

**Supplementary Figure 3. Neutrophil migration on P-selectin surface without IL-8.**

Significant chemotaxis was not observed with neutrophils on tethered P-selectin surface in the absence of IL-8. At a few minutes after establishing a chemoattractant IL-8 gradient, neutrophils display sustained migration in the direction of the gradient. Results represent the mean  $\pm$  SEM, n=12, for each.

**Supplementary Video: RvD1 “stops” neutrophil migration in an IL-8 chemotactic gradient.**

**Table.1 EPA and DHA levels in Human Subjects**

| Reference                             | Subjects                                                 | EPA and DHA levels                                                           | Note                                  |
|---------------------------------------|----------------------------------------------------------|------------------------------------------------------------------------------|---------------------------------------|
| Gong et al., (1992) <sup>21</sup>     | Control group (n=91)                                     | EPA 0.49 ± 0.04 (%)<br>DHA 1.34 ± 0.06 (%)                                   | % of Plasma fatty acids               |
| Newcomer et al., (2001) <sup>22</sup> | Control group (n=156, Men)                               | EPA 0.61 ± 0.36 (%)<br>DHA 4.17 ± 1.26 (%)                                   | % of Total fatty acids in RBC         |
| Albert et al., (2002) <sup>23</sup>   | Control group (n=184)                                    | EPA 1.84 ± 0.53 (%)<br>DHA 2.38 ± 0.78 (%)                                   | % of Total fatty acids in blood       |
| Kew et al., (2004) <sup>24</sup>      | Placebo control, Baseline (n=8-12)                       | EPA 0.7 ± 0.3 (%)<br>DHA 2.8 ± 1.2(%)                                        | % of Total fatty acids in neutrophils |
| Wakai et al., (2005) <sup>25</sup>    | Healthy subjects (n=1257:Japanese, Women: 626, Men: 631) | Women<br>EPA 2.47(%)<br>DHA 4.93(%)<br><br>Men<br>EPA 2.82(%)<br>DHA 5.07(%) | % of Total fatty acids in serum       |

Recently reviewed by Fritsche (2007, Ref <sup>62</sup>) in detail.

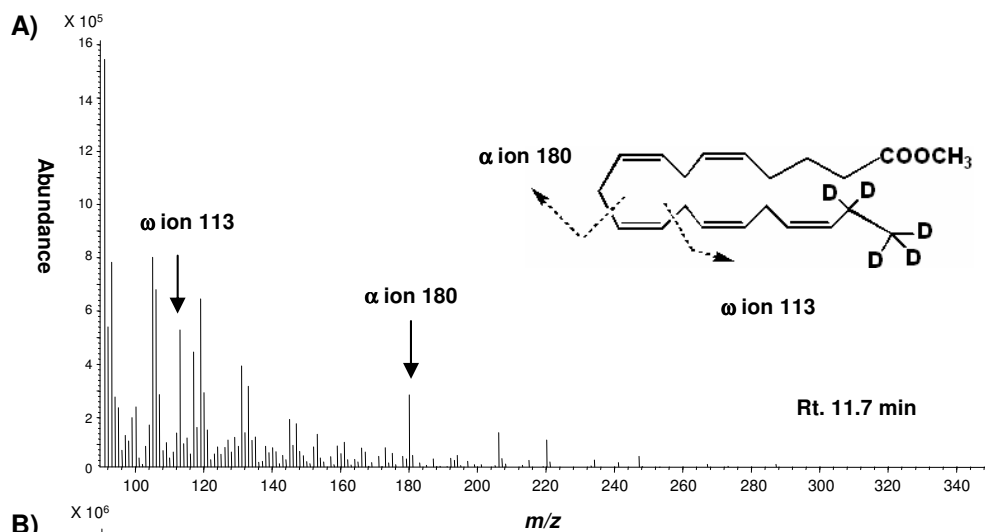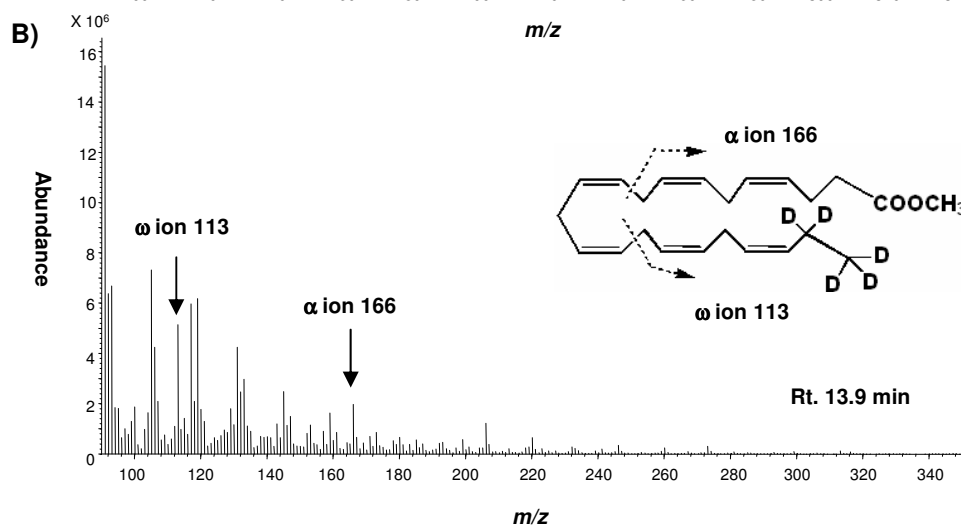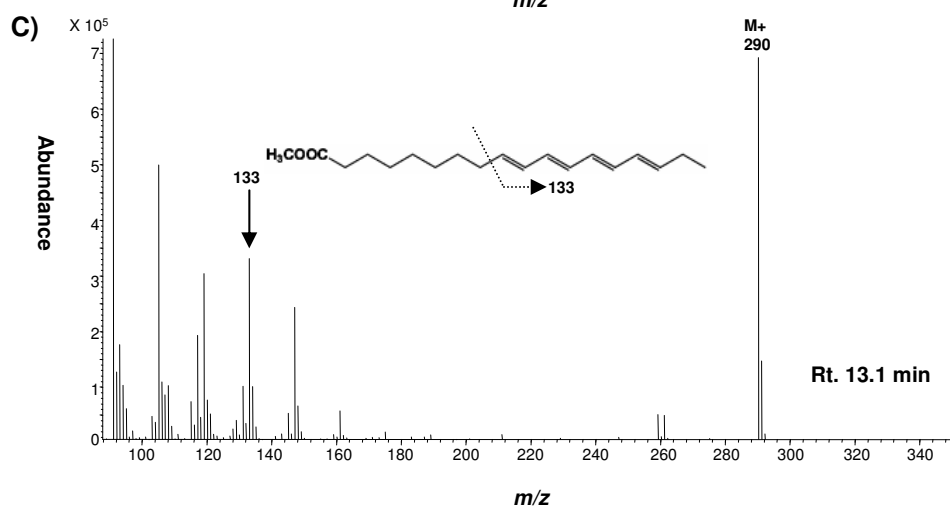

Suppl Fig.1

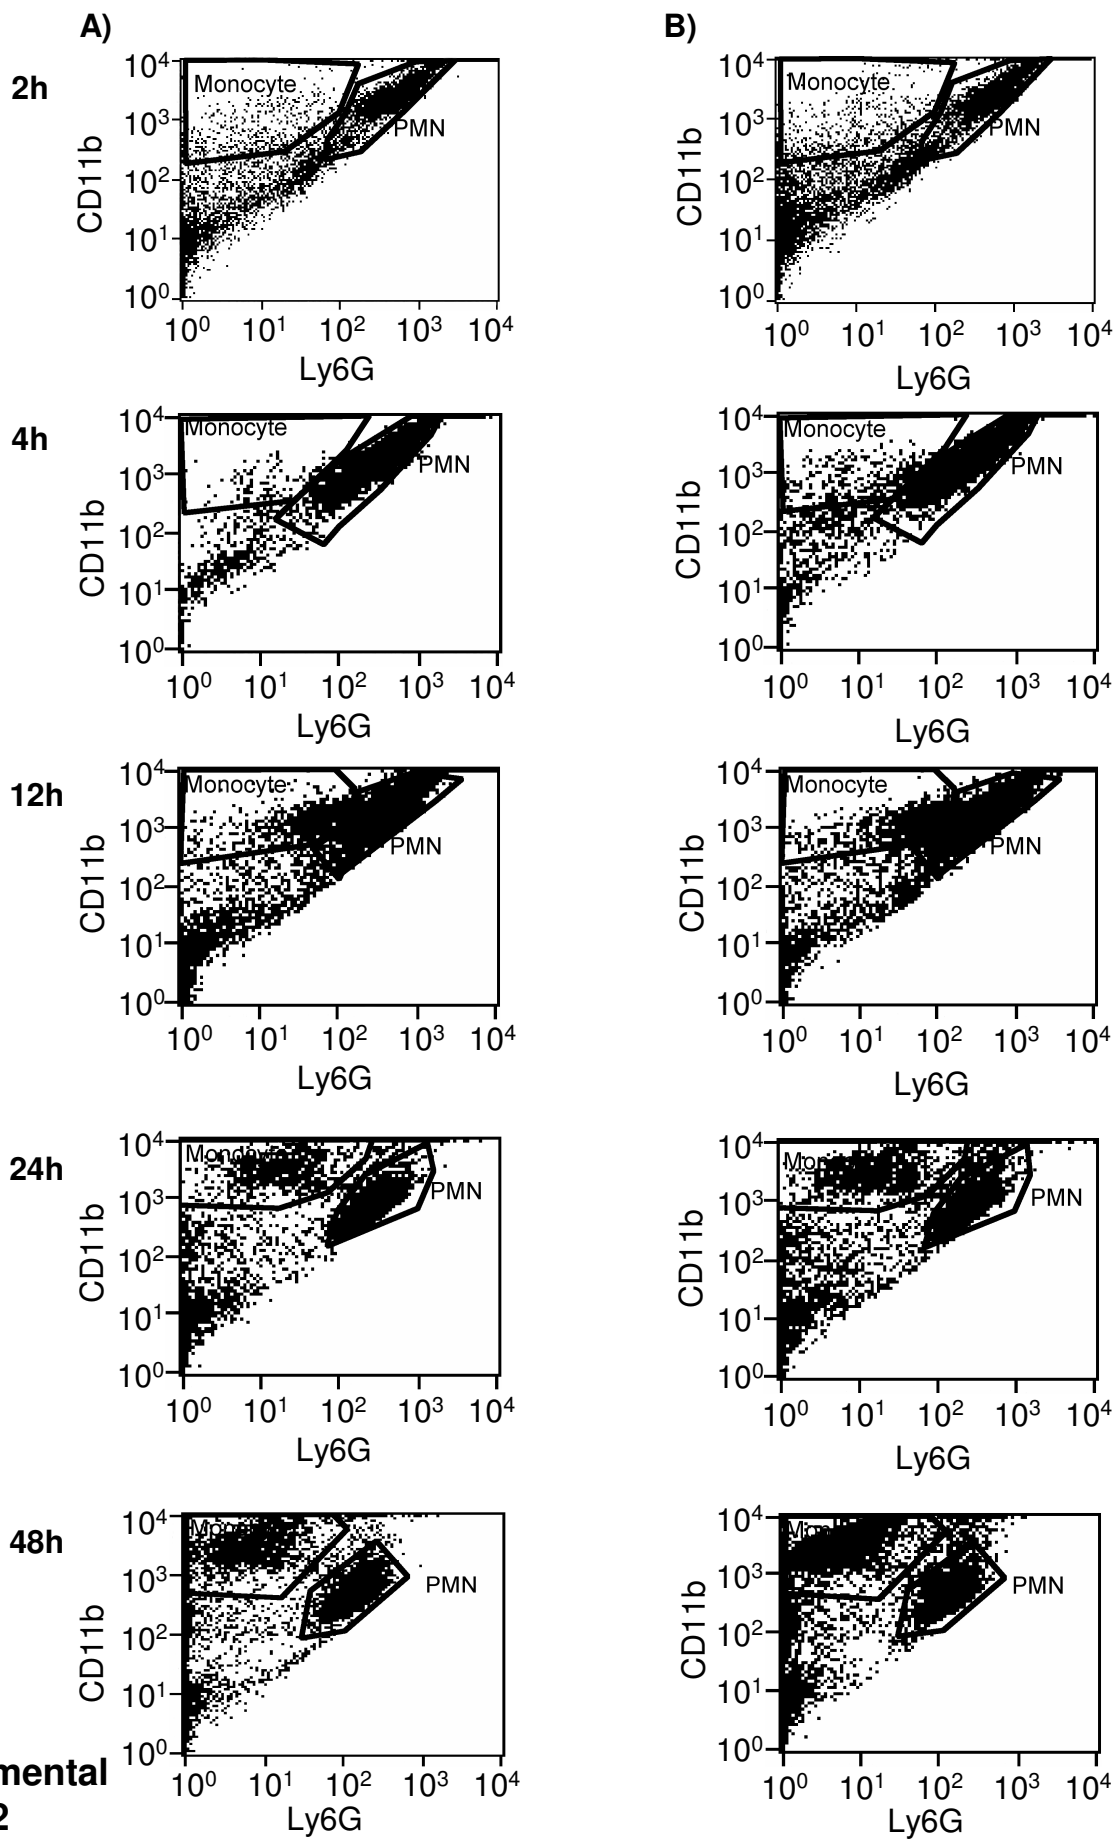

**Supplemental Figure.2**

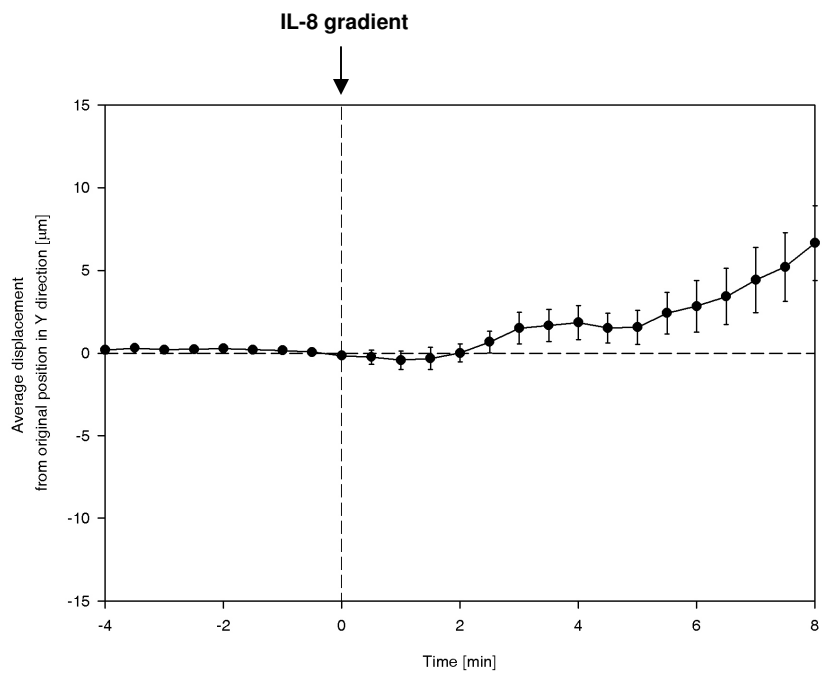

**Suppl Fig.3**
